# Supplementary material for: Boosting the oxygen evolution electrocatalysis of high-entropy hydroxides by high-valence nickel species regulation
Source: Royal Society of Chemistry journal article supplement (doi:10.1039/d2cc02367a), 2022-01-01
Supplement: d2cc02367a1.pdf [file d2cc02367a1.pdf]

## Supplementary Information

### **Boosting oxygen evolution electrocatalysis of high-entropy hydroxide by high-valence nickel species regulation**

Tao Zhang,<sup>a</sup> Yu-Lan Meng,<sup>a</sup> Yu-Hang Zhao,<sup>a</sup> Jing-Chang Ni,<sup>a</sup> Yu Pan,<sup>d</sup> Yan Dai,<sup>c</sup>  
Zhenquan Tan,<sup>a</sup> Xiao-Feng Wang,<sup>\*,b</sup> and Xue-Zhi Song<sup>\*,a</sup>

*<sup>a</sup>State Key Laboratory of Fine Chemicals, School of Chemical Engineering, Dalian University of Technology, Panjin Campus, Panjin 124221, China.*

*<sup>b</sup>Key Laboratory of Materials Modification by Laser, Ion and Electron Beams (Ministry of Education), School of Physics, Dalian University of Technology, Dalian 116024, China.*

*<sup>c</sup>Panjin Institute of Industrial Technology, Liaoning Key Laboratory of Chemical Additive Synthesis and Separation, Dalian University of Technology, Panjin 124221, Liaoning, China*

*<sup>d</sup>Institute of Functional Textiles and Advanced Materials, College of Textiles and Clothing, State Key Laboratory of Bio-Fibers and Eco-textiles, Qingdao University, Qingdao 266071, China*

Email: wangxf@dlut.edu.cn; songxz@dlut.edu.cn

## **1. Experiment section**

### **1.1. Materials**

Chemicals and Reagents include  $\text{Ni}(\text{NO}_3)_2 \cdot 6\text{H}_2\text{O}$ ,  $\text{Co}(\text{NO}_3)_2 \cdot 6\text{H}_2\text{O}$ ,  $\text{Fe}(\text{NO}_3)_3 \cdot 9\text{H}_2\text{O}$ ,  $\text{Cr}(\text{NO}_3)_3 \cdot 9\text{H}_2\text{O}$ ,  $\text{Na}_2\text{MoO}_4 \cdot \text{H}_2\text{O}$ , Hexamethylenetetramine (HMT), KOH (85%), Nafion solution (5wt%, Aldrich corporation). All the reagent were used as received without any further purification.

### **1.2. Materials Synthesis**

In a typical synthesis of NiCoFeCrMo-based HEH, equimolar  $\text{Ni}(\text{NO}_3)_2 \cdot 6\text{H}_2\text{O}$ ,  $\text{Co}(\text{NO}_3)_2 \cdot 6\text{H}_2\text{O}$ ,  $\text{Fe}(\text{NO}_3)_3 \cdot 9\text{H}_2\text{O}$ ,  $\text{Cr}(\text{NO}_3)_3 \cdot 9\text{H}_2\text{O}$  and  $\text{Na}_2\text{MoO}_4 \cdot \text{H}_2\text{O}$  (0.06 mmol each) were dissolved in  $\text{H}_2\text{O}$  (3 mL) to obtain solution A. HMT (1.2 mmol) was dissolved in  $\text{H}_2\text{O}$  (3 mL) to obtain solution B. Then, solution A was poured into solution B and continue stirring for ten minutes to obtain a homogeneous solution. Then the resulting homogeneous solution was transferred into an autoclave lined with polytetrafluoroethylene with a volumetric capacity of 10 mL. The autoclave was heated at 110 °C for 8 h. After cooling down naturally, the powder was obtained by centrifugation and washing twice with deionized water and once with ethanol. The powder product was finally dried at 60 °C for 8 hours. Other catalysts, including NiCoFeCr-LDH, NiCoFe-LDH, NiCo-LDH,  $\alpha\text{-Ni}(\text{OH})_2$ , were prepared by using the same method and the total moles of metal components were kept constant.

### **1.3 Characterizations**

The crystalline structure of powder was characterized using XRD-7000S model X-ray diffractometer (Cu-K $\alpha$  radiation source with a wavelength of 1.5406 Å) produced by Shimadzu Corporation. The Field emission scanning electron microscopy (FESEM) examinations were performed using a FEI Nova Nano SEM 450 field emission scanning electron. Transmission electron microscopy (TEM) images, selected area electron diffraction (SAED), energy-dispersive X-ray spectroscopy (EDS) were collected on a transmission electron microscope of Tecnai-G2 F30 produced by FEEI

Corporation. The surface chemistry was detected using X-ray photoelectron spectroscopy (XPS) with ESCALABTM 250Xi (Al K $\alpha$  radiation source).

#### 1.4 Electrochemical measurements

The OER catalytic performances test was conducted on CHI660E electrochemical workstation (Chenhua, Shanghai) with a typical three-electrode configuration. And KOH (1 M) was used as electrolyte. The glassy carbon electrode (area = 0.19625 cm<sup>2</sup>), Hg/HgO electrode and Pt plate were used as the working, reference, and counter electrode, respectively. To prepare the working electrode, each catalyst (4 mg) was firstly dispersed into a homogeneous solution consisting of 480  $\mu$ L deionized water, 480  $\mu$ L ethanol and 40  $\mu$ L Nafion (5 wt%). Hereafter, the suspension was sonicated for 0.5 h to obtain a uniform catalyst ink. Then the catalyst ink was drop onto glassy carbon electrode with loading amount of 0.362 mg/cm<sup>2</sup>. The potential was calibrated to reversible hydrogen electrode (RHE) following the equation of  $E_{\text{RHE}} = E_{\text{Hg/HgO}} + 0.0591 \cdot \text{pH} + 0.098 \text{ V}$  (pH = 13.99). The overpotential was calculated by  $\eta = E_{\text{RHE}} - 1.23 \text{ V}$ . The Linear sweep voltammetry (LSV) was collected at a scan rate of 5 mV s<sup>-1</sup> without iR-correction. Then the Tafel slope was obtained from the conversion from the LSV curves and subsequent fitting. Electrochemical impedance spectroscopy (EIS) was collected with a frequency ranged from 10<sup>-2</sup> to 10<sup>5</sup> Hz (AC amplitude: 5 mV). Cyclic voltammetry (CV) curves were recorded at a scan rate from 20 mV s<sup>-1</sup> to 100 mV s<sup>-1</sup> with a potential range of 0.2 – 0.3 V versus Hg/HgO to calculate the double layer capacitance ( $C_{\text{dl}}$ ). The long-term stability of catalyst-loaded working electrode prepared by loading HEH on carbon paper (NiCoFeCrMo 1 mg cm<sup>-2</sup>) was test catalyst with chronoamperometry. Turnover frequencies (TOFs) for the OER are calculated using the following equation:

$$\text{TOF} = jS/4Fn$$

Where  $j$  (A cm<sup>-2</sup>) is the current density,  $S$  is the surface area (1.963 cm<sup>2</sup>), the number 4 means 4 electron transfer in the OER reaction,  $F$  is the Faraday constant of 96485 C mol<sup>-1</sup>, and  $n$  is the molar number of Ni from EDS results of NiCo-LDH, NiCoFe-LDH, NiCoFeCr-LDH, HEH.

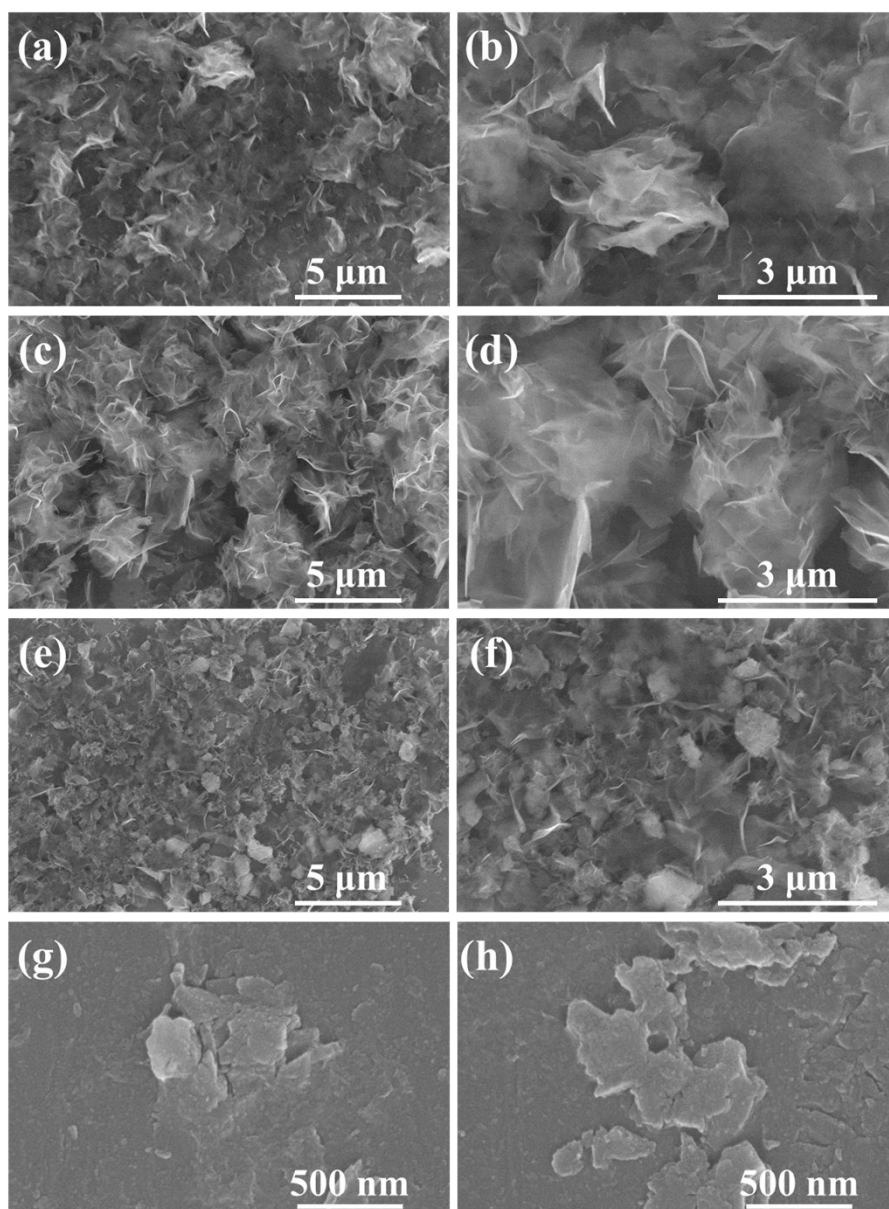

**Figure S1. SEM images of  $\alpha$ -Ni(OH)<sub>2</sub> (a) and (b), NiCo-LDH (c) and (d), NiCoFe-LDH (e) and (f), and NiCoFeCr-LDH (g) and (h).**

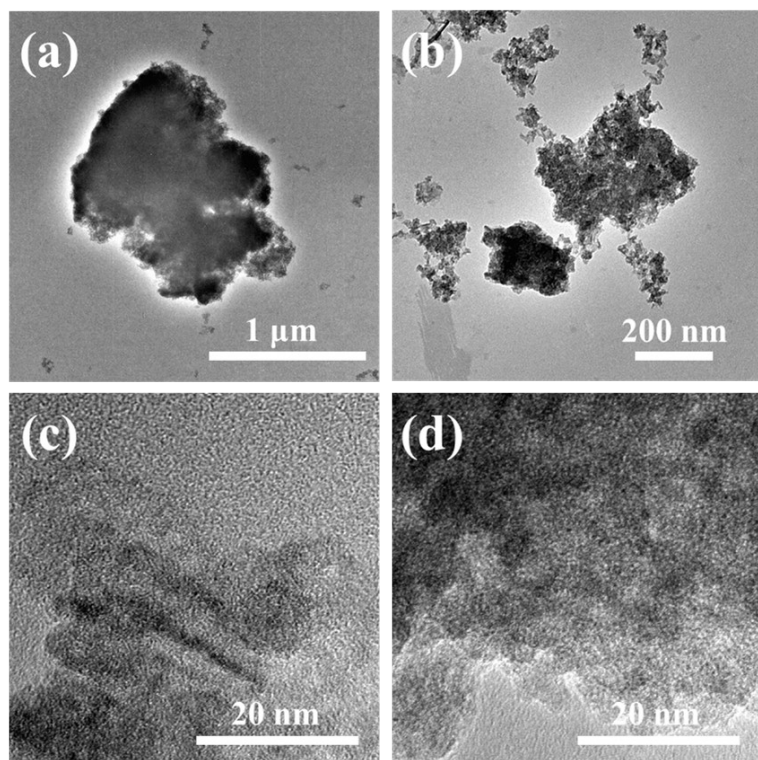

**Figure S2. TEM images of HEH (a) and (b), HRTEM of HEH (c) and (d).**

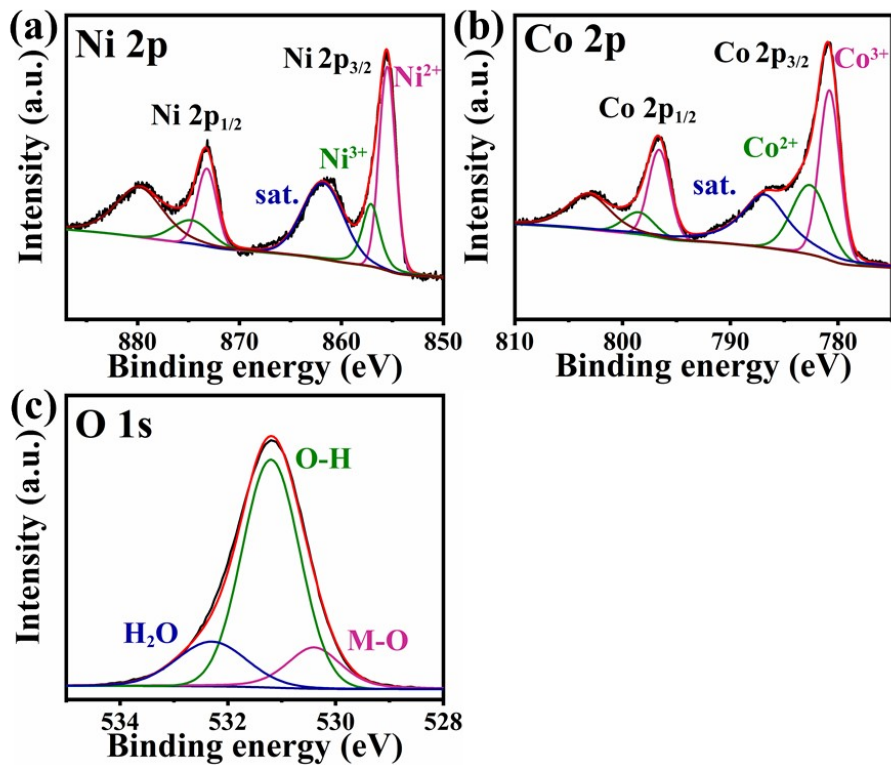

Figure S3. XPS spectra of NiCo-LDH (a) Ni 2p, (b) Co 2p, (c) O 1s.

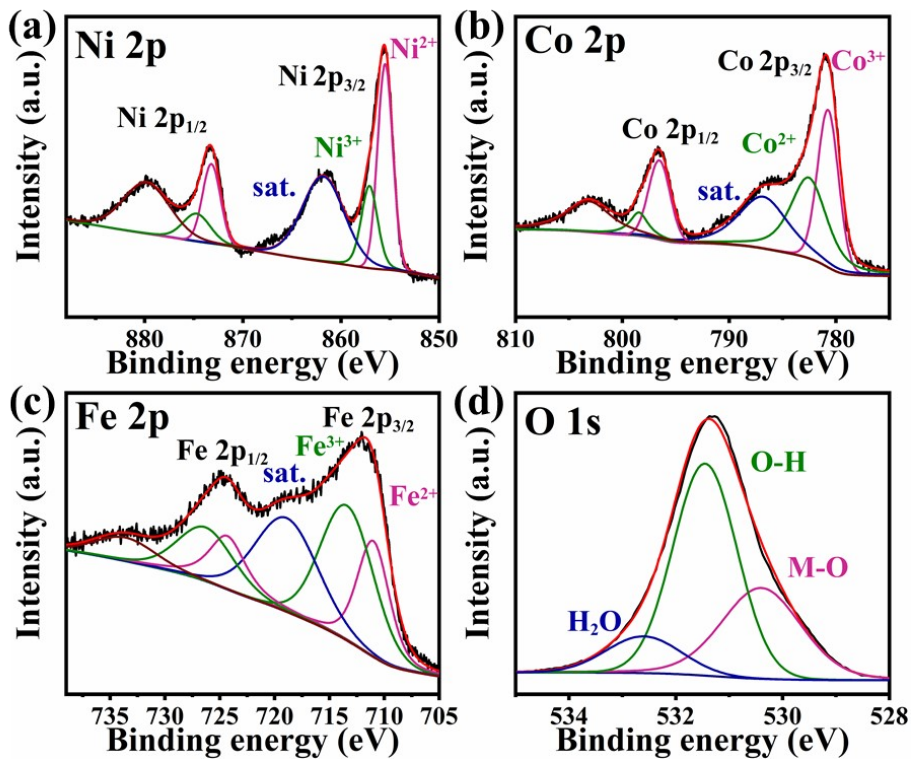

Figure S4. XPS spectra of NiCoFe-LDH, (a) Ni 2p, (b) Co 2p, (c) Fe 2p, (d) O 1s.

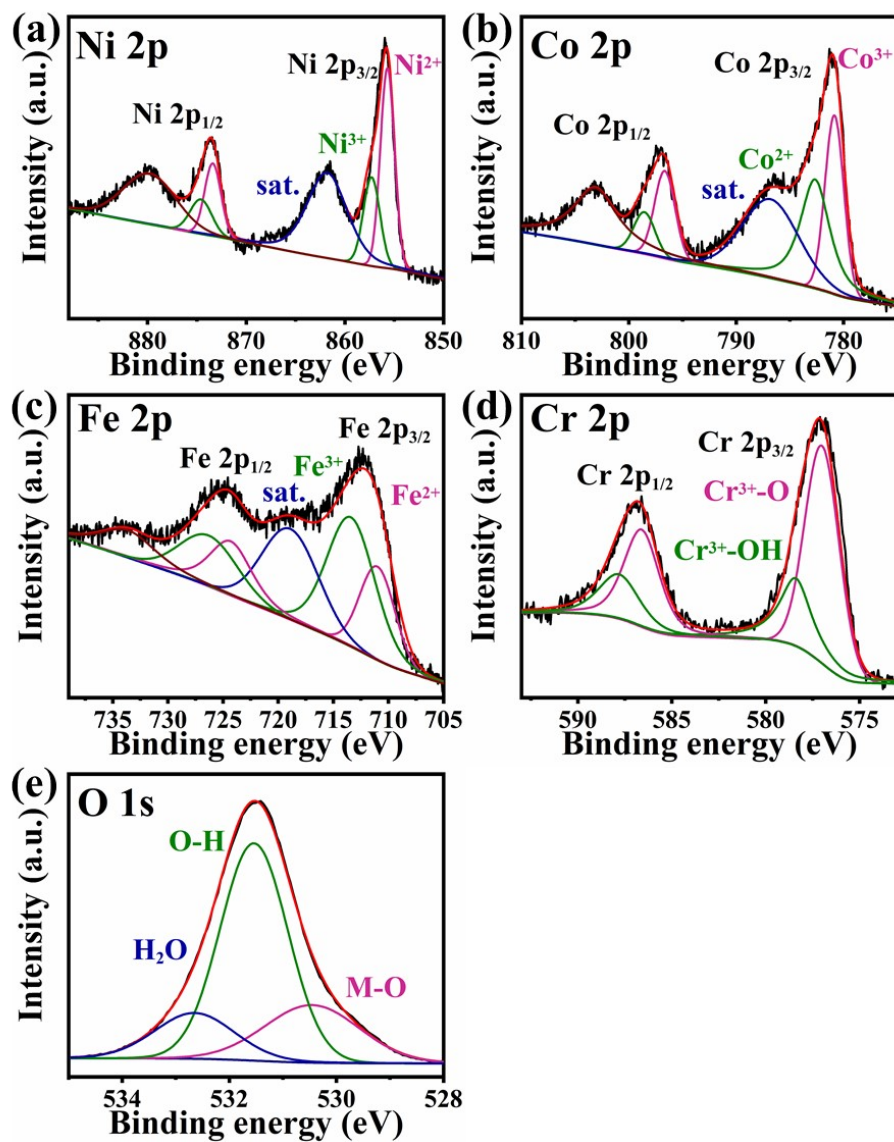

Figure S5. XPS spectra of NiCoFeCr-LDH, (a) Ni 2p, (b) Co 2p, (c) Fe 2p, (d) Cr 2p, (e) O 1s.

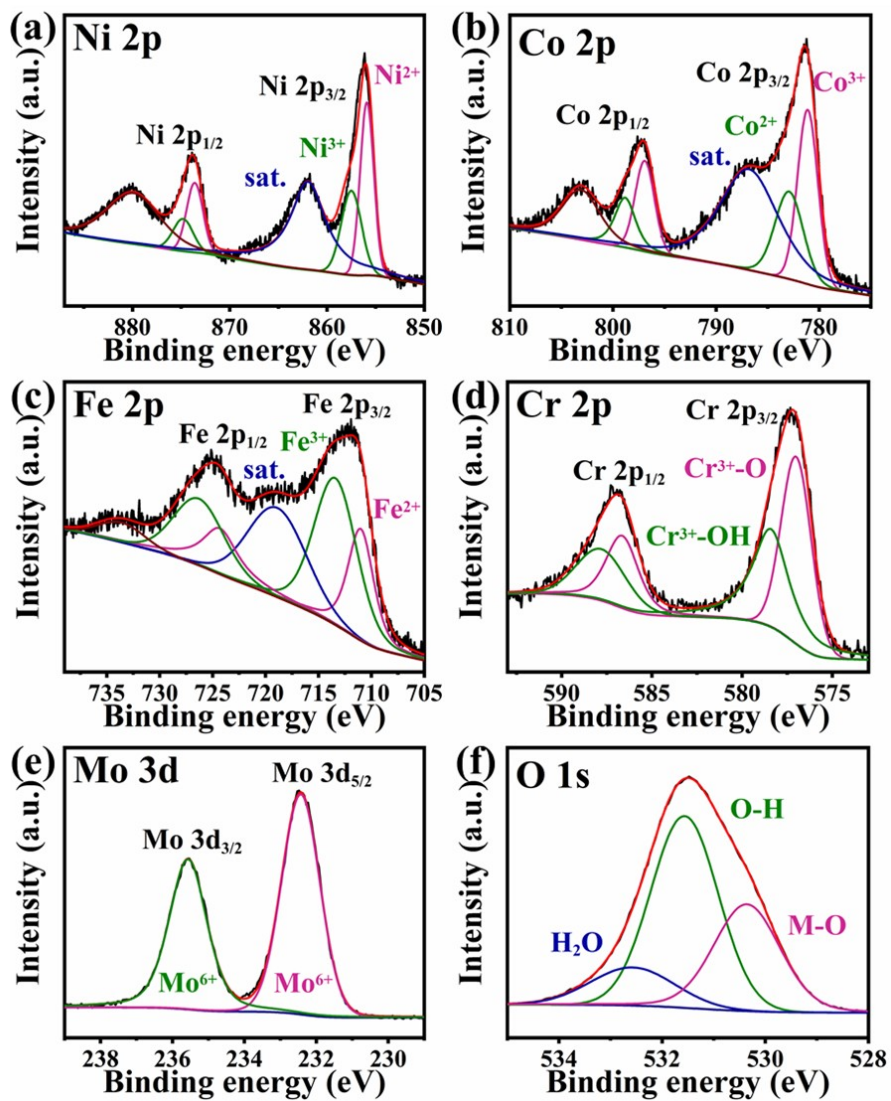

Figure S6. XPS spectra of HEH: (a) Ni 2p, (b) Co 2p, (c) Fe 2p, (d) Cr 2p, (e) Mo 3d and (f) O 1s.



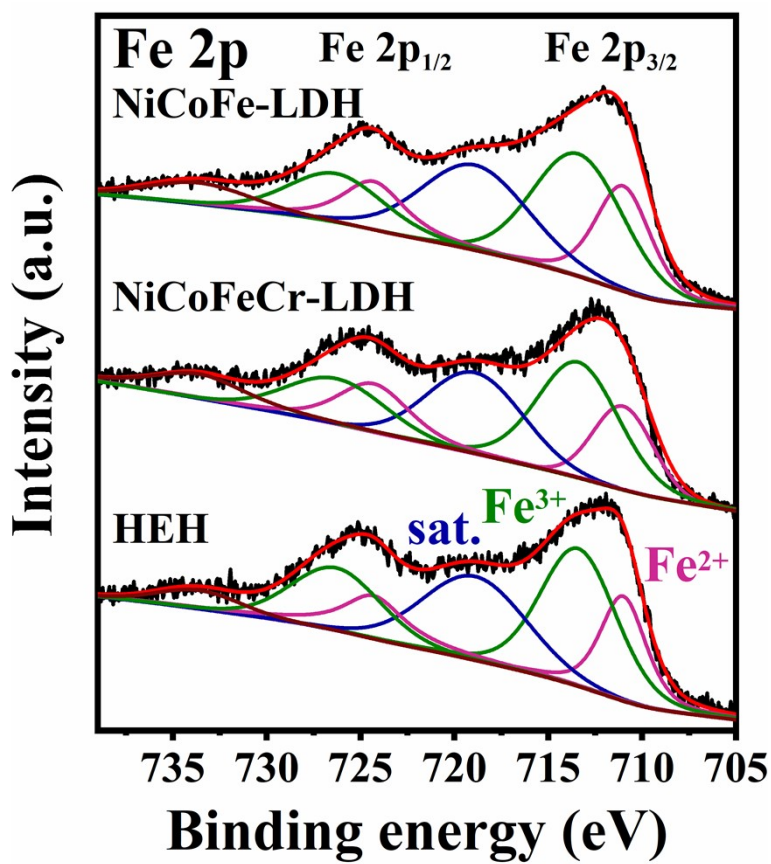

Figure S7. XPS spectra of Fe 2p of different samples for comparison.

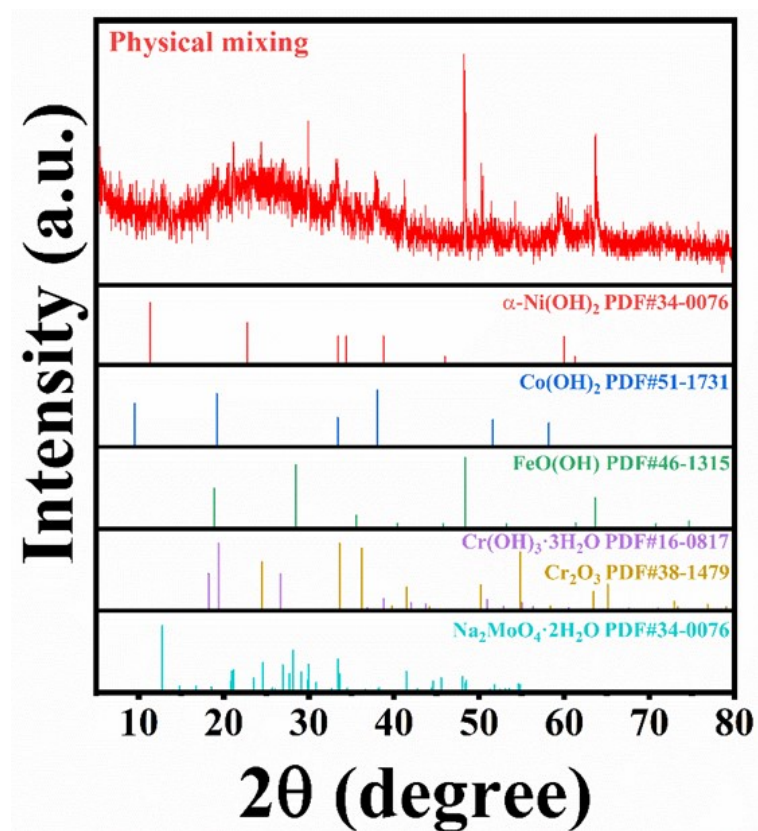

Figure S8. XRD pattern of physical mixing sample.

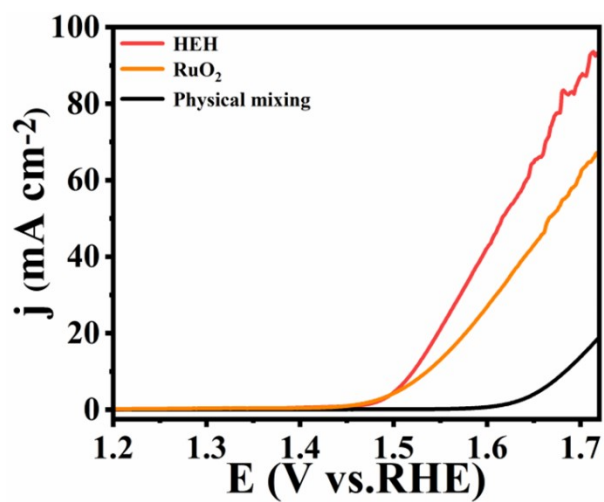

Figure S9. LSV of HEH,  $\text{RuO}_2$  and physical mixing sample.

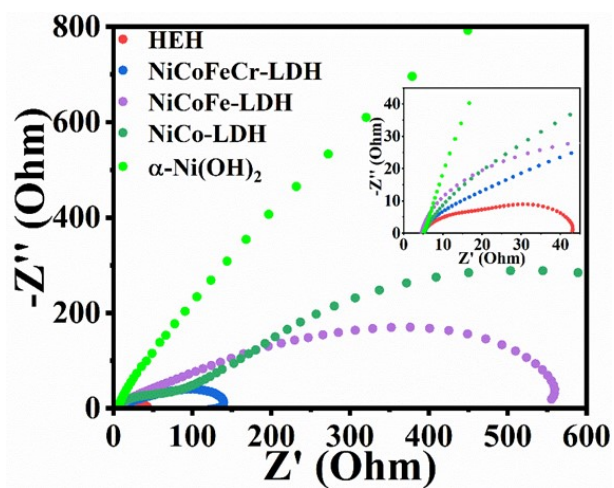

Figure S10. Nyquist plot of each catalyst.

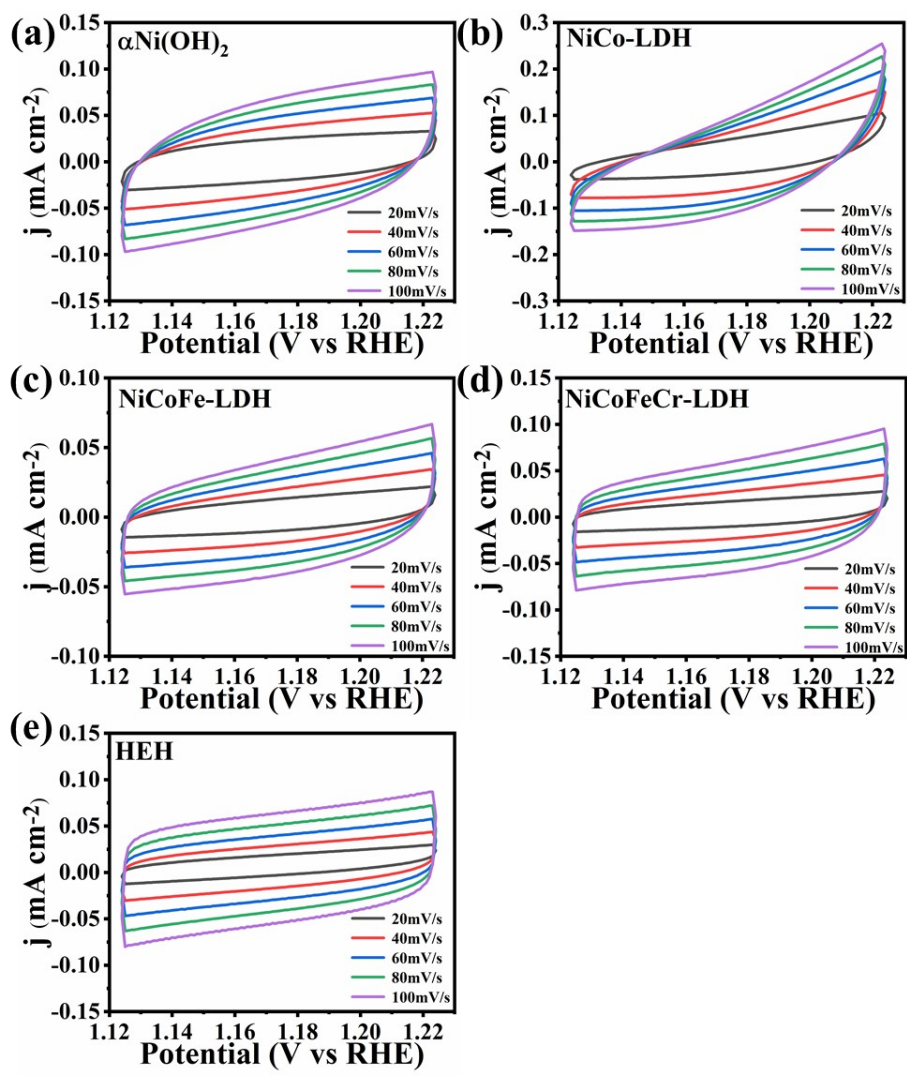

Figure S11. CV curves of different samples. (a)  $\alpha$ -Ni(OH)<sub>2</sub>, (b) NiCo-LDH, (c) NiCoFe-LDH, (d) NiCoFeCr-LDH, (e) HEH.

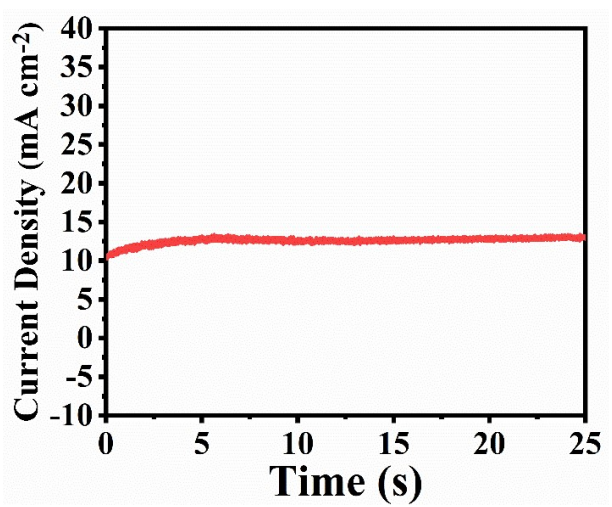

Figure S12. The current-time curve of HEH.

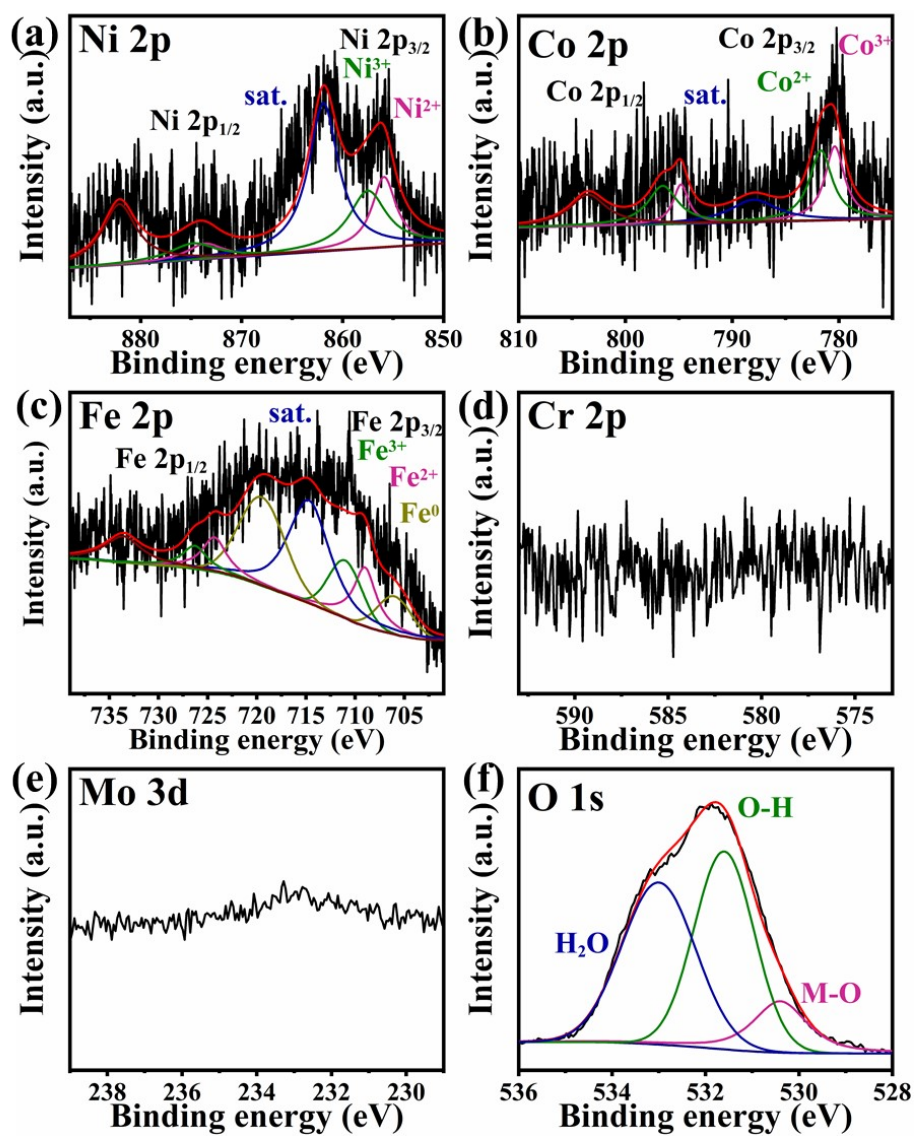

Figure S13. XPS spectra of HEH after long-term stability test.

**Table S1.** EDS analysis attached in SEM equipment of the obtained samples.

| Samples      | Ni<br>(atom%) | Fe<br>(atom%) | Co<br>(atom%) | Cr<br>(atom%) | Mo<br>(atom%) |
|--------------|---------------|---------------|---------------|---------------|---------------|
| NiCo-LDH     | 43.80         | 56.20         | -             | -             | -             |
| NiCoFe-LDH   | 37.90         | 32.47         | 29.63         | -             | -             |
| NiCoFeCr-LDH | 25.32         | 24.16         | 25.04         | 25.46         | -             |
| HEH          | 19.21         | 22.50         | 23.84         | 22.30         | 12.12         |

**Table S2.** Data of  $M^{3+}/M^{2+}$  ratio of different samples.

| Sample            | NiCo-LDH | NiCoFe-LDH | NiCoFeCr-LDH | HEH   | After OER |
|-------------------|----------|------------|--------------|-------|-----------|
| $Ni^{3+}/Ni^{2+}$ | 0.472    | 0.511      | 0.554        | 0.671 | 1.301     |
| $Co^{3+}/Co^{2+}$ | 1.680    | 1.155      | 0.990        | 1.359 | 0.753     |
| $Fe^{3+}/Fe^{2+}$ | -        | 1.526      | 1.600        | 1.754 | 0.844     |

**Table S3.** Comparison for OER activity of HEH with other electrocatalysts.

| Catalyst                                                                                                                     | Overpotential<br>$\eta$ [mV] at 10 mA<br>$\text{cm}^{-2}$ | Tafel slope<br>[mV<br>$\text{decade}^{-1}$ ] | Ref                                       |
|------------------------------------------------------------------------------------------------------------------------------|-----------------------------------------------------------|----------------------------------------------|-------------------------------------------|
| <b>HEH</b>                                                                                                                   | <b>292</b>                                                | <b>54.31</b>                                 | <b>This work</b>                          |
| Au-Ni(OH) <sub>2</sub> /CC                                                                                                   | 288                                                       | 55                                           | Inorg. Chem., 2021, 60, 15818.            |
| NiCo-LDH/ZnCo <sub>2</sub> O <sub>4</sub> /GC                                                                                | 260                                                       | 62                                           | J. Colloid Interf. Sci., 2021, 604, 832   |
| NiSn(OH) <sub>6</sub> @OOH/GC                                                                                                | 370                                                       | 58.4                                         | J. Mater. Chem. A, 2022, 10, 1369         |
| Fe <sub>0.5</sub> CoNiCuZn <sub>0.8</sub>                                                                                    | 340                                                       | 48                                           | J. Mater. Sci. Technol., 2021, 93, 110    |
| (Cr <sub>0.2</sub> Mn <sub>0.2</sub> Fe <sub>0.2</sub> Co <sub>0.2</sub> Ni <sub>0.2</sub> ) <sub>3</sub> O <sub>4</sub> /GC | 322                                                       | 54.5                                         | Chem. Eng. J., 2022, 431, 133448          |
| (FeCoNiCrMn) <sub>3</sub> O <sub>4</sub> -400/CP                                                                             | 288                                                       | 60                                           | Sustain. Energy Fuels, 2022, 6, 1479      |
| CoNiCuMnAl@C/NF                                                                                                              | 215                                                       | 35.6                                         | Chem. Eng. J., 2022, 429, 132410          |
| CoFeCuMoOOH@Cu/Cu foil                                                                                                       | 199                                                       | 48.8                                         | Adv. Mater., 2021, 22, e2100745           |
| FeCoNiMnCu/Alloy                                                                                                             | 280                                                       | 59                                           | Chem. Eng. J., 2021, 425, 131533          |
| NiFeCe-LDH/Mxene/GC                                                                                                          | 260                                                       | 42.8                                         | J. Energy Chem., 2021, 52, 412            |
| NiFe25/PGS                                                                                                                   | 332                                                       | 33                                           | Int. J. Hydrogen. Energy, 2022, 47, 8786. |
| NiFe-25/NF                                                                                                                   | 299                                                       | 48.9                                         | Chem. Eng. J., 2021, 423, 130204.         |
| NiFe LDH-A50/GC                                                                                                              | 308                                                       | 50                                           | ChemSusChem. 2020, 12, 811.               |
| NiO/C@NiFe-LDHs/RDE                                                                                                          | 299                                                       | 45                                           | J. Electrochem. Soc. 2020, 167, 024501.   |
| CoFe-Ni <sub>3</sub> S <sub>4</sub> /NF                                                                                      | 230                                                       | 63                                           | Chem. Eng. J., 2022, 427, 130742.         |
| K <sub>0.8</sub> Na <sub>0.2</sub> (MgMnFeCoNi)F <sub>3</sub>                                                                | 314                                                       | 55                                           | J. Am. Chem. Soc. 2020, 142,              |

**Table S4.** Data for TOF calculation.

| Sample               | HEH                   | NiCoFeCr-LDH          | NiCoFe-LDH            | NiCo-LDH              |
|----------------------|-----------------------|-----------------------|-----------------------|-----------------------|
| Weight%(Ni) from EDS | 11.3                  | 18.56                 | 15.06                 | 17.3                  |
| n(Ni)/mol            | $6.28 \times 10^{-7}$ | $1.03 \times 10^{-6}$ | $8.37 \times 10^{-7}$ | $9.61 \times 10^{-7}$ |
